# Supplementary material for: Subcutaneous Injection of Conditioned Medium from Photobiomodulation- Treated Adipose-Derived Stromal Cells Promotes Hair Growth in Mice
Source: Research Square preprint supplement (doi:10.21203/rs.3.rs-6110120/v1), 2025-05-05
Supplement: Supplementary file 1 [file edc53c5efb43710811713fe4.docx]

**S Materials and Methods**

*S 1. Fluorescence-activated cell sorting (FACS)*

Cells were washed with phosphate buffered saline (PBS) containing 0.5% bovine serum albumin (BSA; SigmaeAldrich, St. Louis, MO). The cells were stained in PBS containing 1% BSA with either isotype controls or antigen specific antibodies for 60 min. The antibodies used were human CD34 (BD Biosciences, San Jose, CA), KDR (Beckman Coulter, Brea, CA), CD31 (Beckman Coulter), CD45 (Abcam, Cambridge, MA), CD90 (BD Biosciences), CD105 (Caltac Laboratories, Burlingham, CA) and CD29 (Millipore, Waltham, MA). The cells were washed thrice with PBS containing 0.5% BSA and resuspended in PBS for flow cytometry using an Accuri device (BD Biosciences). Isotype control IgG was used as a negative control.

**S Figure Captions**

**S FIGURE 1** Immunofluorescence staining and flow cytometry analyses of hASCs. (A) hASCs (passage 4) were stained with CD29, CD90, and CD105 for mesenchymal stem cell identification, KDR, CD31, and CD34 for endothelial lineage cell identification, and SMA for smooth muscle cell identification. Scale bar: 200 μm. (B) Flow cytometry analysis. hASCs cultured for 1 day were stained for CD29, CD90, CD105, CD45, CD31, CD34, and KDR expression and analyzed by flow cytometry.

**
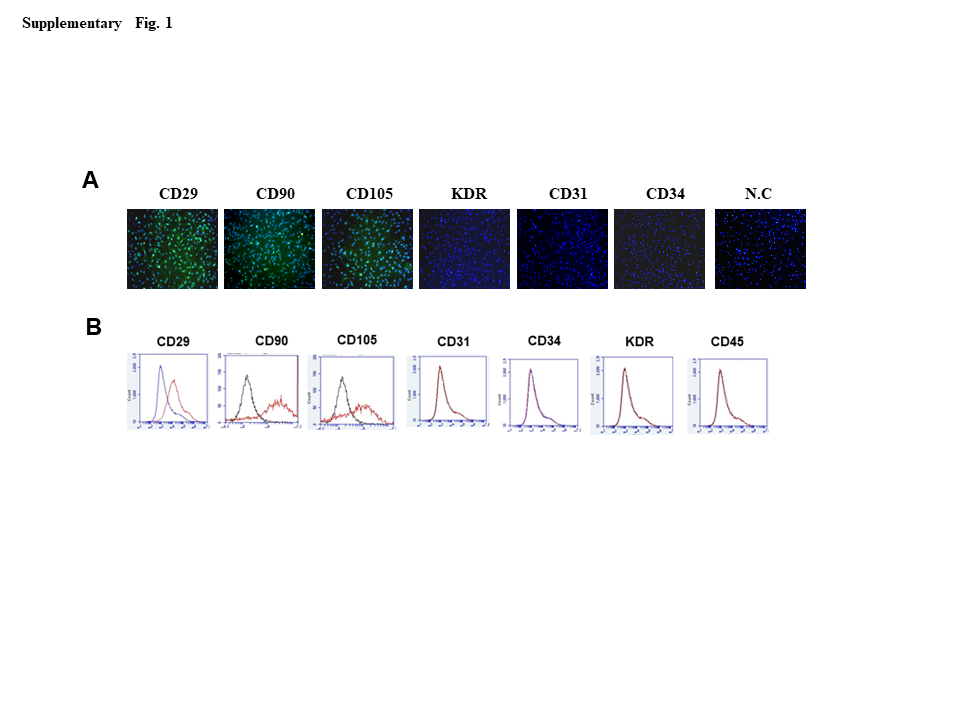
**

**S Table 1.** List of antibodies for immunofluorescence staining.

| Antibody | Host | Company | Catalogue number |
| --- | --- | --- | --- |
| anti-human CD29 | mouse | Millipore | MAB2253Z |
| anti-human Flk-1 | mouse | Santa Cruz | Sc-6251 |
| anti-human CD34 | mouse | Millipore | MAB4211 |
| anti-human CD31 | mouse | Dako | M0823 |
| anti-mouse CD31 | rabbit | BD biosciences | 550274 |
| anti-human CD90 | mouse | BD biosciences | 555595 |
| anti-human CD105 | mouse | Caltac Laboratories | MHCD10500 |
| anti-human FGF | rabbit | Abcam | ab8880 |
| anti-human VEGF | rabbit | Abcam | ab52917 |
| anti-human HGF | rabbit | Santa Cruz | Sc-13087 |
| Alexa Fluor 488 anti-mouse IgG | goat | Invitrogen | A11001 |
| Alexa Fluor 594 anti-rabbit IgG | goat | Invitrogen | A11012 |
